# Supplementary material for: The interplay between parenting stress, parental self-compassion, and parent sex in parental emotion socialization
Source: Research Square preprint supplement (doi:10.21203/rs.3.rs-6921259/v1), 2025-11-03
Supplement: Supplementary file 1 [file fee9e9691e469af7f31880fa.docx]

**Supplementary materials**

**Table S1**

*Correlation matrix*

|  | **1.** | **2.** | **3.** | **4.** | **5.** | **6.** | **7.** | **8.** | **9.** | **10.** | **11.** | **12.** | **13.** | **14.** | **15.** | **16.** | **17.** |
| --- | --- | --- | --- | --- | --- | --- | --- | --- | --- | --- | --- | --- | --- | --- | --- | --- | --- |
| 1. Parenting stress |  | -0.27** | -0.23** | -0.34** | -0.15* | 0.04 | -0.13 | -0.27** | -0.23** | 0.23** | -0.15* | 0.08 | -0.02 | 0.23** | -0.15* | -0.09 | 0.36** |
| 2. Self-compassion |  |  | 0.08 | 0.16* | 0.19** | -0.09 | 0.11 | 0.21** | 0.16* | -0.29** | 0.22** | -0.23** | 0.09 | -0.50** | 0.03 | 0.01 | 0.01 |
| 3. Behavioral disengagement |  |  |  | 0.43** | 0.41** | 0.13 | 0.54** | 0.23** | 0.06 | 0.03 | 0.08 | 0.40** | -0.18* | -0.03 | 0.10 | 0.14 | -0.05 |
| 4. Problem solving |  |  |  |  | 0.56** | 0.08 | 0.32** | 0.44** | 0.36** | -0.18* | 0.35** | 0.04 | 0.06 | -0.04 | 0.10 | 0.07 | -0.13 |
| 5. Social support search |  |  |  |  |  | 0.17* | 0.32** | 0.36** | 0.37** | -0.22** | 0.42 | -0.03 | -0.004 | 0.02 | 0.07 | 0.02 | 0.05 |
| 6. Rumination |  |  |  |  |  |  | 0.13 | 0.11 | 0.12 | 0.38** | 0.12 | 0.20** | -0.08 | 0.06 | 0.01 | 0.03 | -0.07 |
| 7. Distraction |  |  |  |  |  |  |  | 0.45** | 0.11 | -0.05 | 0.30** | 0.35** | -0.03 | -0.12 | 0.10 | -0.03 | 0.04 |
| 8. Reappraisal |  |  |  |  |  |  |  |  | 0.44** | -0.18* | 0.47** | 0.05 | -0.05 | -0.07 | 0.05 | -0.02 | -0.09 |
| 9. Acceptance |  |  |  |  |  |  |  |  |  | -0.20** | 0.30** | -0.23** | -0.02 | 0.07 | 0.03 | 0.02 | 0.03 |
| 10. Expressive suppression |  |  |  |  |  |  |  |  |  |  | -0.17* | 0.32** | -0.09 | -0.01 | -0.003 | 0.03 | -0.06 |
| 11. Venting |  |  |  |  |  |  |  |  |  |  |  | -0.07 | 0.04 | -0.17* | 0.09 | -0.10 | 0.06 |
| 12. Avoidance |  |  |  |  |  |  |  |  |  |  |  |  | -0.13 | 0.10 | 0.08 | -0.05 | -0.05 |
| 13.Parental education |  |  |  |  |  |  |  |  |  |  |  |  |  | -0.09 | -0.03 | 0.06 | -0.02 |
| 14. Parental anxiety or depression |  |  |  |  |  |  |  |  |  |  |  |  |  |  | 0.03 | -0.03 | 0.08 |
| 15. Child age |  |  |  |  |  |  |  |  |  |  |  |  |  |  |  | -0.04 | 0.08 |
| 16. Child sex |  |  |  |  |  |  |  |  |  |  |  |  |  |  |  |  | -0.004 |
| 17. Child AD(H)D/ASD diagnosis |  |  |  |  |  |  |  |  |  |  |  |  |  |  |  |  |  |

*Note*. ***p* < .01. **p* < .05.
